# Supplementary material
Source: PubMed Central journal article supplement (PMC4173165)
Supplement: amiajnl-2013-002171-s1.pdf [file amiajnl-2013-002171-s1.pdf]

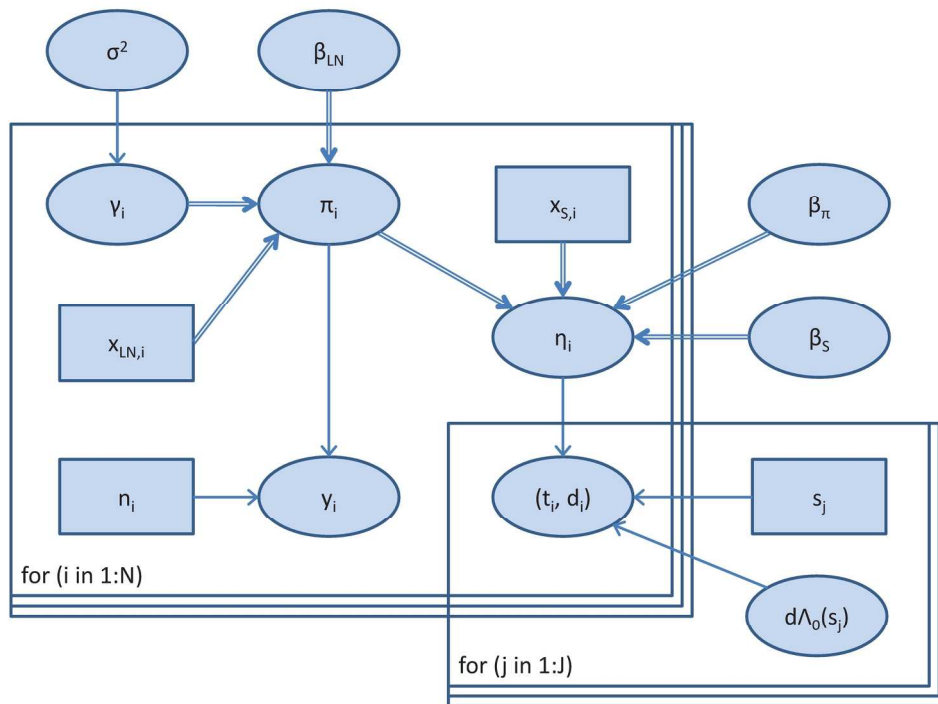

Figure S1. Directed acyclic graph representation of the joint Bayesian model for LNR and survival. Statistical and logical relationships are represented with single and double lines, respectively. Statistical/logical nodes are represented with ellipses, and constant data inputs with rectangles. In the final model, data inputs  $x_{LN,i}$  consist of predictor variables grade, T stage, M stage, and tumor size; and inputs  $x_{S,i}$  consist of age, gender, marital status, race, grade, histology, T stage, M stage, tumor size, and radiation therapy.  
 190x142mm (300 x 300 DPI)
